1

2 **Challenges in assessing the roles of nepotism and reciprocity in cooperation networks**

3 Gerald G. Carter<sup>1</sup>, Gabriele Schino<sup>2</sup>, Damien Farine<sup>3,4</sup>

4

5 <sup>1</sup>Department of Evolution, Ecology, and Organismal Biology; The Ohio State University, USA

6 <sup>2</sup>Istituto di Scienze e Tecnologie della Cognizione, Consiglio Nazionale delle Ricerche, Rome,

7 Italy

8 <sup>3</sup>Department of Collective Behaviour, Max Planck Institut für Ornithologie, Konstanz, Germany;

9 <sup>4</sup>Chair of Biodiversity and Collective Behaviour, Department of Biology, University of Konstanz,

10 Germany

11

12 **Keywords:** cooperation, kin discrimination, mandrills, macaques, vampire bats

13

14 **Abstract**

15 Nepotism and reciprocity are not mutually exclusive explanations for cooperation, because  
16 helping decisions can depend on both kinship cues and past reciprocal help. The importance of  
17 these two factors can therefore be difficult to disentangle using observational data. We developed  
18 a resampling procedure for inferring the statistical power to detect observational evidence of  
19 nepotism and reciprocity. We first applied this procedure to simulated datasets resulting from  
20 perfect reciprocity, where the probability and duration of helping events from individual A to B  
21 equaled that from B to A. We then assessed how the probability of detecting correlational  
22 evidence of reciprocity was influenced by (1) the number of helping observations and (2) varying  
23 degrees of simultaneous nepotism. Last, we applied the same analysis to empirical data on food  
24 sharing in vampire bats and allogrooming in mandrills and Japanese macaques. We show that at  
25 smaller sample sizes, the effect of kinship was easier to detect and the relative role of kinship was  
26 overestimated compared to the effect of reciprocal help in both simulated and empirical data,  
27 even with data simulating perfect reciprocity and imperfect nepotism. We explain the causes and  
28 consequences of this difference in power for detecting the roles of kinship versus reciprocal help.  
29 To compare the relative importance of genetic and social relationships, we therefore suggest that  
30 researchers measure the relative reliability of both coefficients in the model by plotting these  
31 coefficients and their detection probability as a function of sampling effort. We provide R scripts  
32 to allow others to do this power analysis with their own datasets.

33

## 34 **Introduction**

35           A propensity for helping others is an adaptive trait when it yields a net return for the  
36 actor's inclusive fitness by increasing direct fitness, indirect fitness, or both (West, Griffin, and  
37 Gardner 2007a; Hamilton 1964). Indiscriminate cooperation in a well-mixed population can favor  
38 'cheating' whereby less cooperative phenotypes gain the fitness benefits of receiving help from  
39 cooperators without paying the same costs of being cooperative, resulting in an 'evolutionary  
40 tragedy of the commons' (West, Griffin, and Gardner 2007a). Cooperation often takes the form of  
41 an investment in specific individuals or types. Individuals can ensure indirect or direct fitness  
42 returns on their investments by preferentially helping closer kin, *nepotism* (e.g. Griffin and West  
43 2003; Cornwallis, West, and Griffin 2009) or more cooperative partners, *reciprocity* in the  
44 broadest sense (Trivers 1971; e.g. Rutte and Taborsky 2008; Dolivo and Taborsky 2015; Schino  
45 and Aureli 2017; Carter 2014; Taborsky, Frommen, and Riehl 2016). Crucially, these strategies  
46 can coexist: helping decisions can be influenced by both kinship cues and past experience of  
47 reciprocal help. These factors can also interact; for instance, reciprocity can be stronger or weaker  
48 among kin than among nonkin (Van Cleve and Akçay 2014; Trivers 1971; Axelrod and Hamilton  
49 1981). Evidence for nepotism and reciprocity can therefore be difficult to disentangle, especially  
50 from correlational data (e.g. social networks based on cooperative behaviors such as grooming of  
51 food sharing). Indeed, nepotism and reciprocity are causal mechanisms that cannot be directly  
52 demonstrated with correlational data. But moreover, we will show how correlational data can lead  
53 to incorrect and even opposite conclusions about the relative roles of nepotism and reciprocity  
54 caused by asymmetries in the sampling effort needed to accurately estimate kinship versus  
55 reciprocal helping. Nepotism can make it difficult to detect correlational evidence for reciprocity  
56 even when nepotism is limited and reciprocity is perfect. We discuss the reasons for this and  
57 provide a method to help assess the power to detect the effects of kinship and reciprocal help.

58           For nonhuman animals, a claim of reciprocity is far more contentious than nepotism.  
59 Despite growing correlational and experimental evidence, there is still disagreement about the

60 existence and importance of reciprocity outside humans (Clutton-Brock 2009; Carter 2014;  
61 Taborsky, Frommen, and Riehl 2016; Schino and Aureli 2017). One reason for this debate is that  
62 authors do not agree on what the term ‘reciprocity’ means or should mean (West, Griffin, and  
63 Gardner 2007b; Noë 2006; Carter 2014; Bshary and Bergmüller 2008; Lehmann and Keller 2006).  
64 Definitions of reciprocity (also called reciprocation, reciprocal altruism, reciprocal cooperation,  
65 contingent cooperation, and direct reciprocity) have varied between authors and sub-disciplines  
66 (Carter 2014). The original concept of ‘reciprocal altruism’ (Trivers 1971) was quite broad and  
67 arguably ambiguous, but subsequent and more narrow definitions of reciprocity restricted its  
68 general importance to humans (Carter 2014). For example, the term ‘reciprocity’ has been used to  
69 describe: a *broad category* of enforced mutual benefit (analogous to kin selection), a *correlation*  
70 between cooperation given and received across dyads or over time (analogous to kin-biased  
71 association), a conditional helping *behavior* that causes this correlation (analogous to nepotism),  
72 and a specific *psychological mechanism* that might cause this conditional behavior (analogous to  
73 phenotype matching) (Carter 2014). For our purposes here, we define *reciprocity* broadly as help  
74 given that is influenced by rates of help received (i.e. reciprocal help), where help can involve  
75 different behaviors integrated over short or long timespans.

76 Reciprocity is most evident in controlled experiments where helping rates are immediate  
77 responses to past help received, and where partners lack a long-term social relationship  
78 (Schweinfurth and Taborsky 2018a; Schweinfurth et al. 2017; Taborsky, Frommen, and Riehl  
79 2016; Dolivo and Taborsky 2015; Rutte and Taborsky 2008). Reciprocity can be harder to test in  
80 the context of an enduring social relationship, because this by definition means that the partners  
81 will integrate social experiences over longer timespans, and because reciprocal help can take  
82 multiple forms, such as allogrooming, food sharing, coalitionary support (Schino and Aureli  
83 2017; Carter 2014; Jaeggi et al. 2013; Seyfarth and Cheney 2012). In the case of such a  
84 cooperative relationship, the rates of helping measured by an observer are actually a proxy for a  
85 measure of the strength of the underlying causal relationship, rather than the immediate cause of

86 observed reciprocal help. In other words, helping events from A to B should predict helping  
87 events from B to A, not because the first event directly caused the second event, but because A  
88 and B have a cooperative relationship that causes symmetrical bidirectional helping rates (Schino  
89 and Aureli 2010a, 2009). To distinguish between causation and correlation, we use the term  
90 *symmetry* for the observed correlation between rates of help given and received—the most  
91 common observational evidence for reciprocity. Similarly, we use the term *kinship bias* for the  
92 observed correlation between help given and kinship—the most common observational evidence  
93 for nepotism.

94       Semantics aside, reciprocity is also contentious because it is difficult to test, especially in  
95 the presence of nepotism. Nepotism is also expected to cause symmetry in helping because  
96 kinship is symmetrical; if two sisters often help each other, the help could be pure kin altruism or  
97 it could be reciprocal. Whereas kinship bias is considered sufficient evidence for nepotism,  
98 symmetry is not widely considered to be sufficient evidence of reciprocity (Carter 2014). A  
99 demonstration of reciprocity requires experimentally manipulating helping rates and then  
100 measuring a change in reciprocal helping (Schweinfurth and Taborsky 2018a; Dolivo and  
101 Taborsky 2015; Rutte and Taborsky 2008; Krams et al. 2013; Krama et al. 2012; Krams et al.  
102 2008; Fruteau et al. 2009). In such tests, kinship can be excluded as a factor by testing only  
103 nonkin. However, reciprocity is also expected to play a role in cooperation among kin (Jaeggi and  
104 Gurven 2013; Schino and Aureli 2010c; Schweinfurth and Taborsky 2018b; Taborsky et al. 2016;  
105 Wilkinson 1984; Wilkinson 1988). An experimental test of both nepotism and reciprocity  
106 requires simultaneously manipulating cues to both kinship and past experience of cooperation  
107 (Schweinfurth and Taborsky 2018b; Zöttl et al. 2013). The logistical difficulty of such a test  
108 explains why the vast majority of evidence for both reciprocity and nepotism is correlational (e.g.  
109 Carter and Wilkinson 2013; Schino and Aureli 2010c).

110       Many studies, especially with primates, have compared the relative effect sizes of  
111 reciprocal help and kinship on rates of cooperative behaviors such as grooming or food sharing

112 using correlational data (Jaeggi and Gurven 2013; Schino and Aureli 2010c; Carter and  
113 Wilkinson 2013; Koster 2011; Silk et al. 2013; Thomas et al. 2018; Wright et al. 2016; Jaeggi et  
114 al. 2016; Engelhardt et al. 2015). A challenge with interpreting this correlational evidence is that  
115 the simultaneous effects of nepotism and reciprocity are not equally detectable. Kinship estimates  
116 will generally be more precise than estimates of helping rates because of inherent differences in  
117 sampling effort. For example, each tissue sample can yield a huge number of genetic markers for  
118 assessing dyadic genetic relatedness, but each behavioral sample of watching a group of animals  
119 will typically yield only few or no helping events for assessing dyadic helping rates. As a  
120 consequence, the more precise estimate of the correlation between kinship and helping can often  
121 be over-estimated and detected more easily compared to the less precise estimate of the  
122 correlation between help given and received. This means that the presence of nepotism can make  
123 simultaneous reciprocity harder to detect.

124         To assess this idea, we developed a resampling procedure for inferring power to detect  
125 both kinship bias and symmetry in mixed-kinship groups. To simulate perfect reciprocity in long-  
126 term social bonds, we created data of helping events where individuals based their decisions to  
127 help on an unobserved history of past reciprocal help that is perfectly symmetrical within specific  
128 pairs. We then systematically changed two variables: (1) the degree of nepotism and (2) the  
129 number of observed helping events. Finally, we used permutation and bootstrapping to assess  
130 how these two factors interactively influenced the probability of detecting evidence for  
131 reciprocity.

132         To demonstrate the application of our approach to empirical data, we then applied the  
133 same permutation and bootstrapping procedures to three datasets where both kinship and  
134 reciprocity are suspected to co-exist: allogrooming in female mandrills (*Mandrillus sphinx*),  
135 allogrooming in female Japanese macaques (*Macaca fuscata*), and food sharing in female  
136 common vampire bats (*Desmodus rotundus*). Mandrills appear to form large groups structured by  
137 matriline (Bret et al. 2013; Abernethy, White, and Wickings 2002), and show evidence for

138 reciprocal allogrooming (Schino and Pellegrini 2009) and kin discrimination (Levréro et al. 2015;  
139 Charpentier et al. 2007). Japanese macaques are nepotistic, have a despotic social network with a  
140 steep dominance hierarchy based largely on maternal kinship, and direct allogrooming to  
141 dominant individuals and to consistently preferred partners (Balasubramaniam et al. 2018).  
142 Regurgitated food sharing in vampire bats has been a classic example of the possible co-  
143 occurrence of reciprocity and nepotism (Wilkinson 1988; Wilkinson 1984).

144 To test if and how nepotism prevents the detection of evidence for reciprocity, we  
145 inferred the power to detect both kinship bias and symmetry in simulated and real datasets of  
146 various sizes. To generate slopes and their significance (p-values), we used a permutation test  
147 designed to deal with collinearity and non-independence (Dekker, Krackhardt, and Snijders 2007).  
148 We plotted the slopes and detection rates for kinship bias and symmetry as a function of sampling  
149 effort (sample sizes of observed helping events). These plots show whether the relative roles of  
150 kinship and reciprocal help are either remaining ambiguous or becoming clearer with more data.  
151 R scripts are available online (Carter et al. 2018) so that others can apply or adapt them to their  
152 own kinship and cooperation network data.

153

## 154 **Methods**

### 155 *Inferring power and precision of symmetry and kinship bias*

156 To infer power, we estimated how estimates of kinship bias (the correlation between  
157 kinship and helping given) and symmetry (the correlation between help given and help received)  
158 vary with an increasing number of observations (N; note that N is the number of observed helping  
159 events, not the number of individuals). To create about 20 equally-spaced values of N, we started  
160 at N = 20 and added 5% of the total sample of observed interactions with each next step. For  
161 example, a dataset of 500 observations would mean 20 sample size values (N = 20, 45, 70, 95,  
162 120 .... 500 measured events). At each step, we randomly sampled N observations from the total  
163 dataset. We sampled with replacement (bootstrapping) to avoid confounding smaller variances at

164 larger samples sizes with smaller variances in our samples. We bootstrapped the datasets 1000  
165 times at each sample size. For instance, at the first step we randomly sampled 20 observations  
166 with replacement 1000 times. To analyze the simulated data (described below), we created a  
167 different dataset of size N observations by sampling from the given probability distributions 1000  
168 times, rather than bootstrapping a single dataset 1000 times as we did with the empirical data.

169 For each observed dataset, we extracted the observed coefficients of kinship and  
170 reciprocal help from a matrix permutation test: multiple regression quadratic assignment  
171 procedure with double semi-partialling (MRQAP-DSP, (Dekker, Krackhardt, and Snijders 2007)).  
172 We defined the response variable ‘help’ for individual A to B as the total of duration of help from  
173 A to B, divided by the total duration of help received by B for all times where A could have  
174 helped B. This measure controls for differences in sampling time, and current situational factors  
175 such as need (Farine 2015). ‘Reciprocal help’ for A to B is defined as help from B to A. We  
176 applied a log transformation to the empirical allogrooming and food sharing durations because  
177 they were lognormal. We z-transformed all variables to obtain standardized beta coefficients, so  
178 that an observed coefficient of X for kinship indicates that a one standard deviation increase in  
179 kinship predicts an increase of X standard deviations in help.

180 To calculate p-values for the observed coefficients, we used network-level permutations  
181 (Farine 2017) randomizing each input variable independently using the standard approach from  
182 the MRQAP-DSP function in the R package ‘asnipe’ (Farine 2013). We used this procedure to  
183 generate one null coefficient from a randomized network for each observed coefficient, resulting  
184 in 1000 observed and 1000 paired null coefficient values for the two predictors, kinship and for  
185 reciprocal help, at each sample size step. At each sample size, we then calculated (1) the mean  
186 and 95% confidence interval (CI) for the observed coefficients, which are the observed symmetry  
187 and kinship bias estimates, (2) the mean and 95% CI for the null coefficients, which are the  
188 symmetry and kinship bias estimates expected under the null hypothesis, (3) the proportion of  
189 samples where the observed coefficient was greater than the paired null coefficient, which



190 indicates if the effect is real using all the samples, and (4) the proportion of observed coefficients  
191 that were greater than 95% of the expected null coefficients, which indicates the power to detect  
192 an effect with one sample of a given size.

193

#### 194 *Simulating data with perfect symmetry and 0-100% nepotism*

195 We simulated 500 observations of help among 20 individuals. To simulate correlational  
196 outcomes expected from perfect reciprocity, we generated a weighted directed network of  
197 symmetrical social bonds, such that the helping rate from A to B was always equal to helping rate  
198 of B to A. This symmetrical probability of helping, or social bond strength, could be imagined as  
199 representing a history of past unobserved helping interactions in which both individuals helped  
200 each other in both directions many times, in which case individuals that did not reciprocate  
201 therefore no longer have a strong social bond. To create an event, we then randomly sampled one  
202 individual as the actor and selected a remaining individual as the recipient with a probability that  
203 was proportional to the social bond strength. The duration of help was also equal to the social  
204 bond strength. All observed helping was therefore determined by a symmetrical social bond.

205 To simulate nepotism as an additional factor, the social bond strength must also correlate  
206 with kinship to varying degrees. Nepotism determines the degree to which kinship predicts past  
207 reciprocal helping, so we calculated social bond strength ( $b$ ), as a combination of a random  
208 kinship value ( $r$ ) and a random non-kinship value ( $c$ ), weighted by a ‘nepotism coefficient’ ( $n$ ),  
209 which ranges from 0 to 1:

$$210 \quad b = nr + (1-n)c$$

211 The nepotism coefficient therefore represents the degree to which the social bond  
212 strength (and hence the probability of helping) correlates with kinship. For simplicity, we  
213 sampled  $r$  and  $c$  from uniform distributions, but we obtained similar results from other  
214 distributions. Increasing nepotism will increase the observed kinship bias, and we created

215 populations where nepotism equaled either 0, 0.25, 0.5, 0.75, or 1 (Table S1). Finally, we added a  
216 step to ensure that all individuals were observed helping at least one other individual.

217 In sum, these simulations generated an observed set of helping events where individuals  
218 could have based their actual helping decisions entirely on the experience of past reciprocal help.  
219 However, this reciprocity co-existed across a spectrum of nepotism from 0% nepotism, where  
220 helping rates were symmetrical and kinship played no role, to 100% nepotism, where helping  
221 rates were symmetrical but social bonds only ever formed among kin, such that the relative causal  
222 roles of reciprocal help and kinship are therefore unclear without experimental evidence. There  
223 are of course many possible causes of symmetrical helping besides reciprocity. The point of this  
224 simulation is to ask: If perfect reciprocity did exist among individuals that were also somewhat  
225 nepotistic, how likely are we to detect the evidence for reciprocity or to overestimate the evidence  
226 for kinship bias?

227

#### 228 *Real datasets*

229 We applied this resampling procedure as a power analysis for three real datasets. Each  
230 dataset including a list of cooperative interactions (either grooming or regurgitated food sharing),  
231 the duration of the trial (sampling period) during which each occurred, the individuals present  
232 during the trial (possible actors and receivers), the actor, the receiver, and the interaction duration.  
233 The first two studies were conducted on mandrills and Japanese macaques housed at the Rome  
234 Zoo (Bioparco) in Italy. In both studies, kinship was based on maternal pedigrees, all subjects  
235 were available as potential grooming partners during the study, and an observer recorded the  
236 duration of all female-female grooming episodes involving a focal subject as actor or recipient.  
237 The first dataset contained 1703 observations of mandrill allogrooming collected between July  
238 2014 and June 2015 from 10 sexually mature female mandrills in a group that also included two  
239 mature males. A past study of six female mandrills from the same captive population found that  
240 allogrooming A to B predicted allogrooming B to A, when controlling for kinship (Schino and

241 Aureli 2010c), or when controlling for kinship and rank and excluding recent reciprocal grooming  
242 (Schino and Pellegrini 2009).

243 The second dataset contained 737 observations of macaque allogrooming collected  
244 between April and November 1996 from 22 sexually mature female Japanese macaques in a  
245 group of 71 that also included mature males and juveniles. Similar to the mandrills, analyses of  
246 allogrooming in the same captive population of Japanese macaques found symmetry in female  
247 allogrooming, and also found that allogrooming predicted support in social conflicts when  
248 controlling for kinship, rank, or time spent in proximity (Schino et al. 2007), and allogrooming  
249 was better predicted by kinship than by grooming received (Schino and Aureli 2010c).

250 The third dataset included 408 regurgitated food-sharing donations among 15 female  
251 common vampire bats from previous studies where food sharing was induced by fasting a subject  
252 (for details, see Carter and Wilkinson 2015, 2013). Each donation size was estimated by the total  
253 seconds that the unfed subject licked the mouth of a fed groupmate. Kinship was estimated using  
254 a maternal pedigree and maximum likelihood estimates applied to genotypes of 19 polymorphic  
255 microsatellite markers (for details see Carter and Wilkinson 2015). Past analyses of these same  
256 data found that food sharing was better predicted by reciprocal sharing than by kinship, when  
257 controlling for grooming and donor sex (Carter and Wilkinson 2013a; Carter and Wilkinson  
258 2013b), and this conclusion was supported by later experiments showing that the bats were  
259 attracted to the calls of nonkin donors more than nondonor kin (Carter and Wilkinson 2016), and  
260 that females that previously fed more nonkin were less affected by the removal of a donor from  
261 their food-sharing network (Carter et al. 2017).

262

### 263 *Code availability*

264 Data and R code, including functions to apply the same procedure to other datasets, is  
265 available online at the *figshare* data repository (Carter, Schino, and Farine 2018b; Carter, Schino,  
266 and Farine 2018a).

267

## 268 **Results**

### 269 *Simulated data*

270            Nepotism reduced the ability to detect perfect reciprocity in helping. We constructed the  
271 simulations such that a perfectly symmetrical social bond determined helping rates at every level  
272 of nepotism. At 100% nepotism, symmetry and kinship bias are completely confounded and the  
273 relative roles of reciprocal help and kinship cannot be disentangled. At 25% or 50% nepotism, the  
274 kinship bias is clearly not as important as the social bond strength. Yet as nepotism increased  
275 above zero, the p-values were more likely to incorrectly infer that nepotism was supported by the  
276 data while reciprocity was not (Figure 1). The reasons for this can be seen in the plots of the size  
277 and precision of the observed and null coefficient estimates with increasing sampling effort  
278 (Figure S1-S5). Nepotism increases the correlation between the two predictors: kinship and  
279 reciprocal help (Figure S6), but estimates of kinship bias were less variable than the estimates of  
280 reciprocal help. At 50% nepotism, kinship biases were often estimated to be larger than reciprocal  
281 help, even though the generative probabilities and the actual durations of helping were always  
282 perfectly symmetrical (Figure 1). In these scenarios, where we know the real contribution of both  
283 kinship and reciprocal help as drivers of helping, we see that kinship bias was consistently  
284 overestimated relative to symmetry. Moreover, even with zero nepotism, estimates of symmetry  
285 were still underpowered at 500 observations (Figure 1, see also Figure S7).

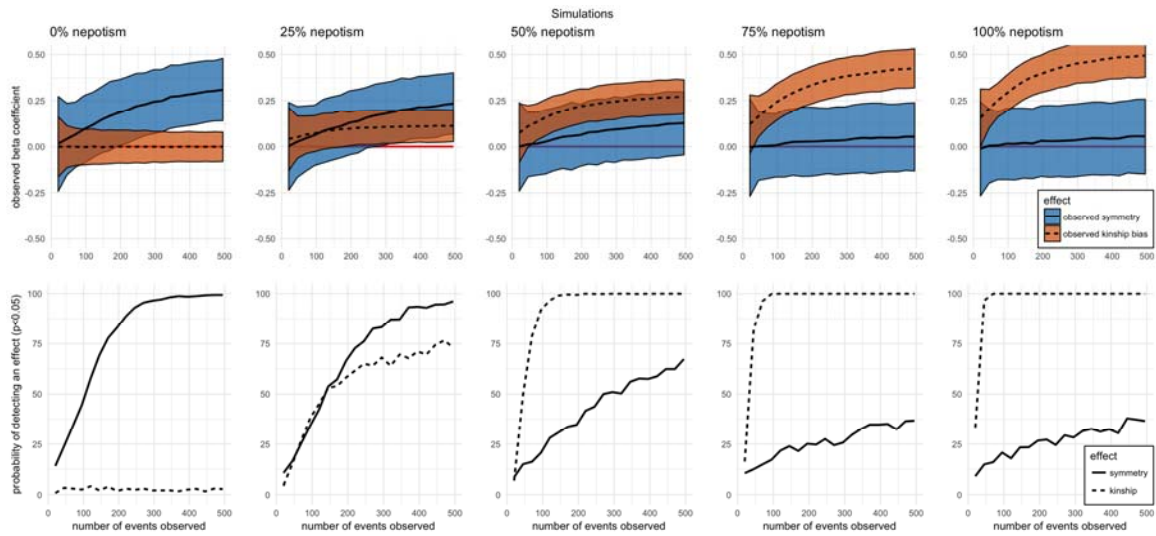

286

287

**Figure 1. Simulated data: Kinship bias masks perfect symmetry in cooperation networks.** The

288

probability and durations of help and reciprocal help are perfectly symmetrical within all dyads, and the

289

degree of simultaneous nepotism increases from left to right. Top panels show the mean and 95%

290

confidence interval of the standardized slope estimates for the effects of helping rate A to B (solid line,

291

purple shading) and kinship between A and B (dotted line, yellow shading) as predictors of helping rate B to

292

A. Bottom panels show the percentage of observed coefficients that were greater than 95% of the

293

coefficients expected based on network permutations. Supplementary Figures S1-S5 in the appendix show

294

plots for the null coefficients and for the probability of the observed coefficients being greater than expected

295

coefficients.

296

297

*Real data*

298

Results with empirical data are consistent with expectations from the simulations. For

299

female mandrill allogrooming, symmetry was eventually detected to be significantly greater than

300

kinship bias but this required more than 1250 observations (Figure 2A, 2B). The ability to detect

301

either effect was similar across sampling efforts (Figure 2C, 2D). A sample of 1703 observations

302

provided adequate power to detect both effects, but the relative effect size estimates of symmetry

303

and kinship appear to still be diverging with more observations (Figure 2A), suggesting that the

304

relative contribution of nepotism may still be over-estimated despite this large sample size of

305

helping events.

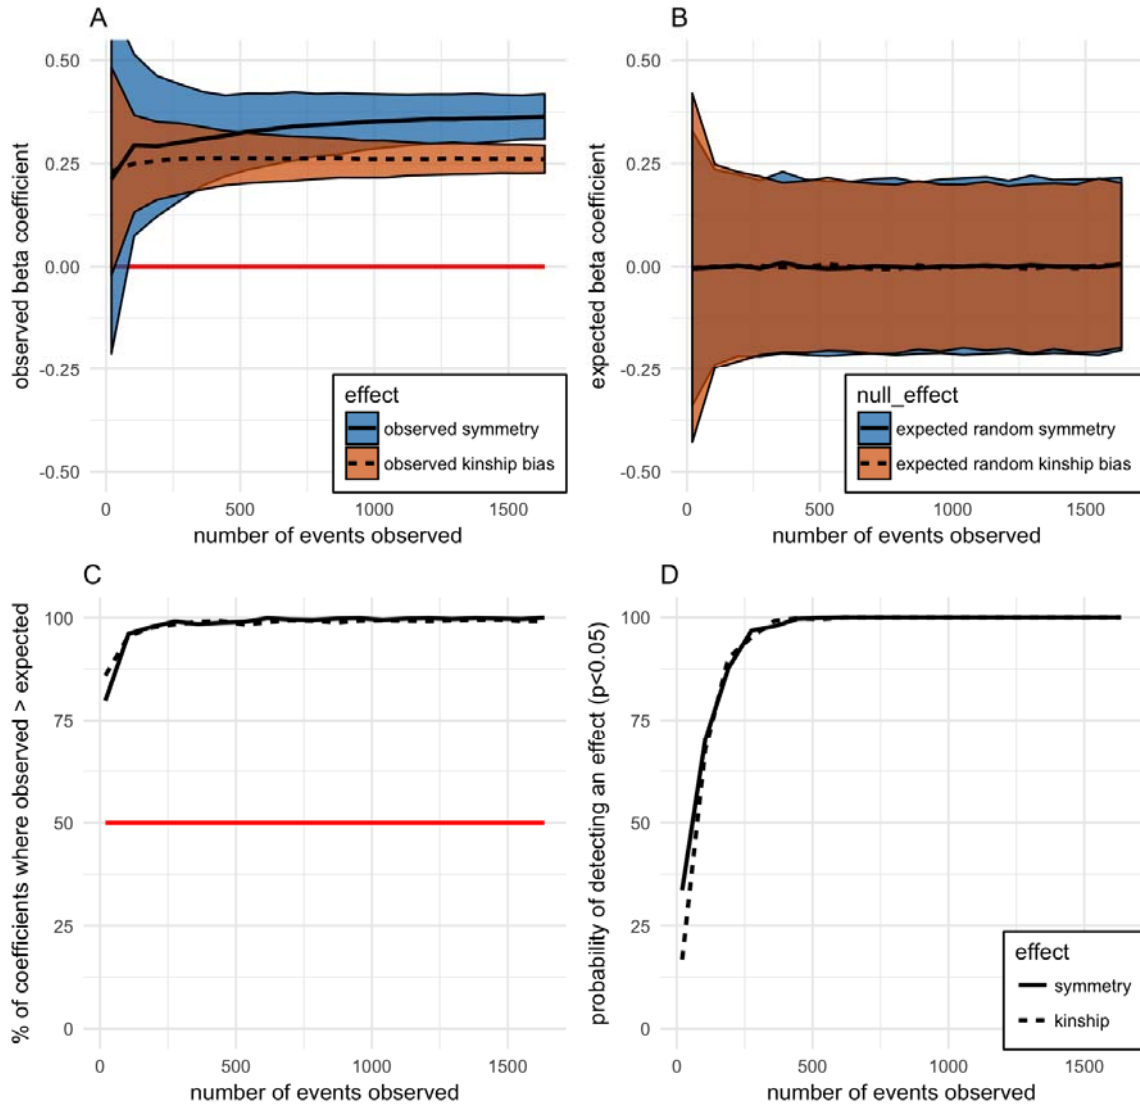

306

307 **Figure 2. Female mandrills: observed and expected symmetry and kinship bias in allogrooming**

308 **networks with increased sampling effort.** Panel A shows the mean and 95% confidence interval of the

309 standardized slope estimates for the effects of helping rate A to B (solid line, purple shading) and kinship

310 between A and B (dotted line, yellow shading) as predictors of helping rate B to A. Panel B shows the same

311 for the expected null coefficients generated by permutation. Panel C shows the percentage of observed

312 coefficients that are greater than the paired null coefficient generated from the same subsample. If effects

313 are real, then these values should be higher than 50% (red line). Panel D shows the percentage of observed

314 coefficients that are greater than 95% of expected null coefficients for that sample size.

315

316 For female macaque allogrooming, where nepotism is quite strong, a sample size of about  
317 60 observations provided enough power to reliably detect a positive kinship bias, but the full set  
318 of 737 observations did not provide enough power to reliably detect positive symmetry (i.e.  
319 power < 80%, Figure 3). This highlights the combined impacts of greater nepotism and fewer  
320 helping events per dyad.  
321

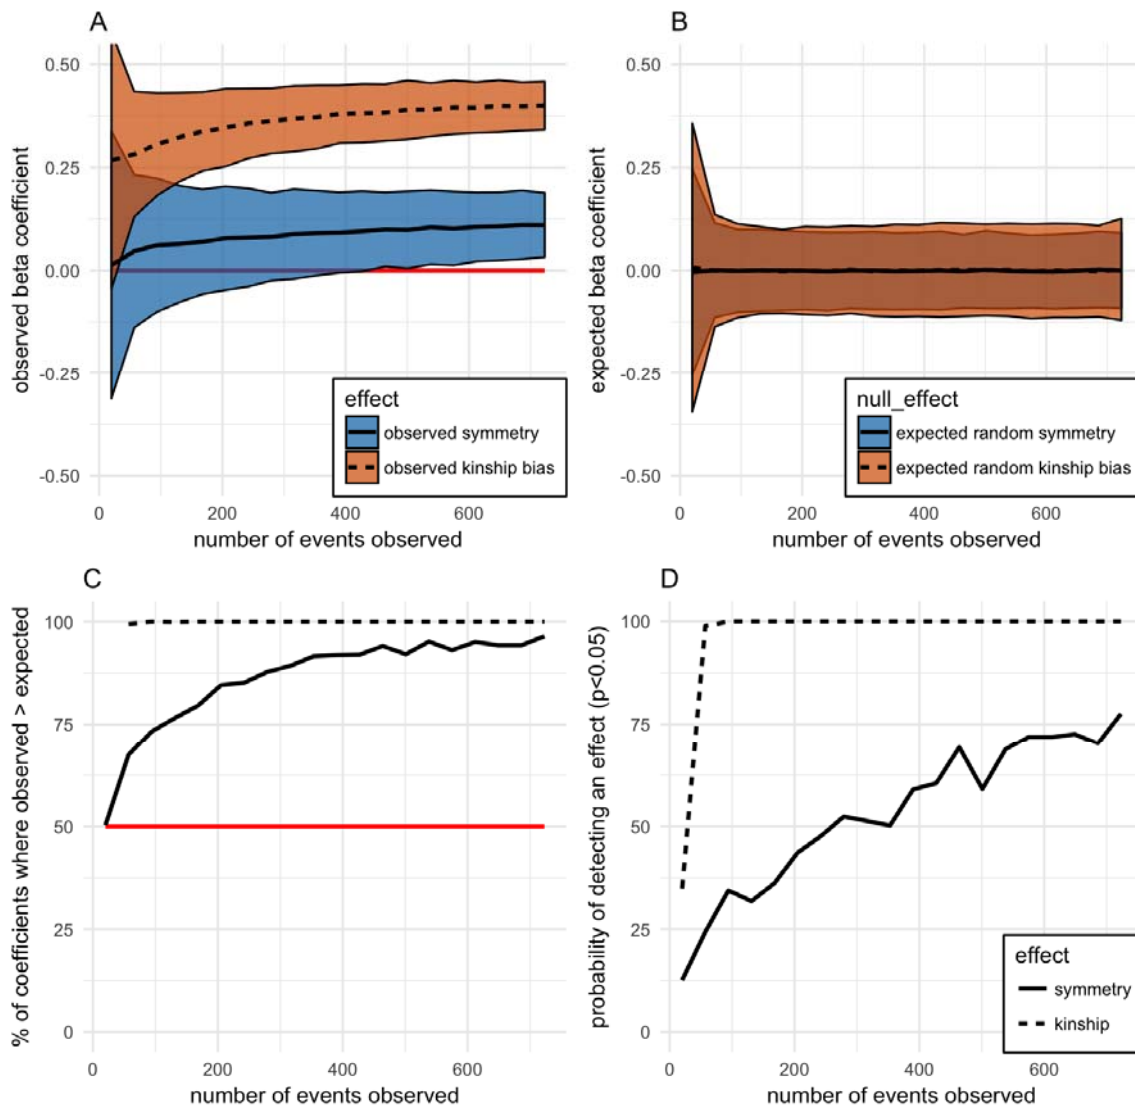

322

323 **Figure 3. Female Japanese macaques: observed and expected symmetry and kinship bias in food-**  
324 **sharing networks with increased sampling effort.** See Figure 2 for explanation of plots.

325

326           For food sharing in female vampire bats, kinship bias is detected more reliably than  
327 symmetry at all sample sizes (Figure 4). The estimate of kinship bias is relatively stable at about  
328 200 observations, but at 400 observations the estimate of symmetry is still increasing with  
329 additional sampling. There is enough power to detect positive kinship bias and symmetry, but  
330 power is lacking to reliably estimate the amount of symmetry (Figure 4). Together the plots from  
331 our simulations combined with those from the empirical datasets illustrate how and why detecting  
332 kinship bias and symmetry requires much less sampling effort than identifying their relative  
333 importance.  
334



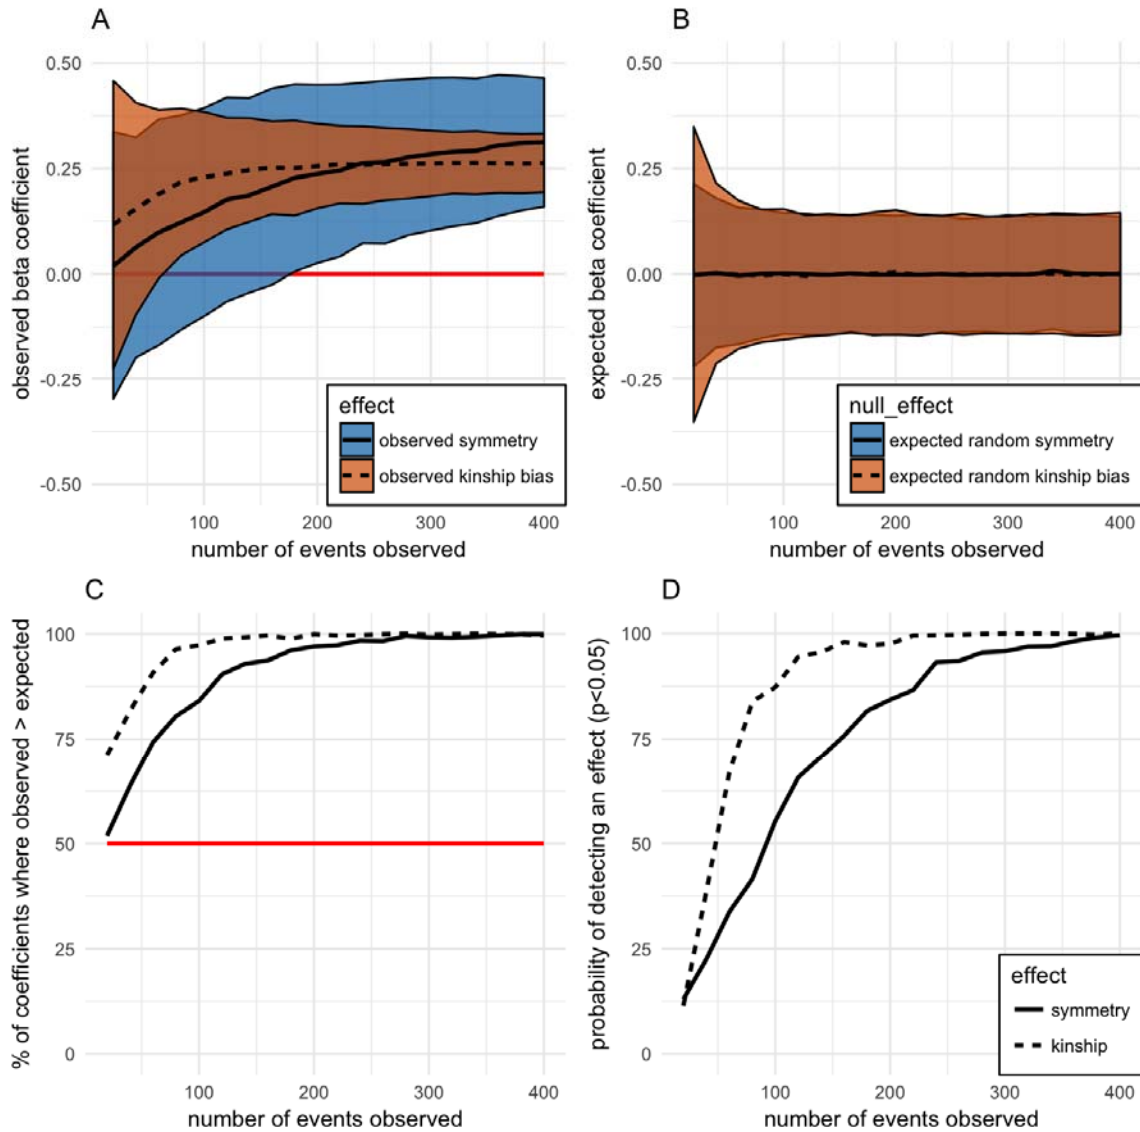

335  
336

337 **Figure 4. Female vampire bats: observed and expected symmetry and kinship bias in food-sharing**  
338 **networks with increased sampling effort.** See Figure 2 for explanation of plots.

339

#### 340 **Discussion**

341 *Nepotism can make evidence for reciprocity harder to detect*

342 If kinship and long-term reciprocal help are simultaneous predictors of helping events,

343 then nepotism will often be easier to detect and its role will often be overestimated relative to

344 long-term reciprocal help (or social bond strength). Looking at the simulation results of Figure 1,

345 consider a scenario of 100 helping observations, where individuals are performing perfect  
346 reciprocity. At zero nepotism, symmetry (the correlation between help given and received) will  
347 be detected ('statistically significant') with a 50% probability, and nepotism will have a low rate  
348 of false positives. At 25% nepotism, however, a researcher is now equally likely to detect  
349 symmetry versus a kinship bias. At 50% nepotism, kinship bias further masks symmetry and the  
350 probability of correctly detecting symmetry drops to less than 25% and kinship bias is detected  
351 about 90% of the time. At 75% and 100% nepotism, kinship bias is always detected while  
352 symmetry is usually not.

353         Even if both effects are detected, the relative coefficient sizes would give the clear but  
354 misleading appearance that helping decisions must be influenced more by kinship than by social  
355 experience. In the 100% nepotism scenario, where the symmetry and kinship bias are exactly  
356 equal, kinship bias is always detected. By comparison, the same sampling effort in the 0%  
357 nepotism scenario gives us only 50% power to detect evidence of reciprocity.

358         Why does this happen? Estimating a correlation or slope coefficient requires having  
359 accurate data on the predictor as well as the response variables. Cases with two highly correlated  
360 predictors can lead to imprecise estimates of both coefficients, making each effect harder to  
361 detect. More critically, the most precisely estimated predictor, in this case kinship, will often  
362 appear to have a relatively larger coefficient and to be more important, regardless of its true  
363 causal role. The precision of kinship estimates is independent of the number of helping events  
364 observed, whereas symmetry uses the number of helping events to estimate rates of help both  
365 given and received.

366         Genetic relatedness is becoming increasingly easy to measure compared to the history of  
367 helping interactions. Pedigrees can be supplemented or replaced by genetic or genomic data,  
368 which is becoming cheaper and easier to collect (Städle and Vigilant 2016). The precision of  
369 marker-based relatedness estimates is also often estimated by resampling methods. In contrast,  
370 the history of cooperation between any two individuals is often unknown and this lack of

371 precision is not always noticed, because there is often confusion about whether each helping  
372 event from A to B is just a data point for estimating an underlying cooperative relationship or the  
373 direct cause for the next helping event in the other direction (Carter 2014; Schino and Aureli 2017,  
374 2010b; Schino and Aureli 2009; de Waal and Brosnan 2006; Seyfarth and Cheney 2012). In most  
375 cases where both reciprocity and nepotism are expected to co-exist (as in the primates and  
376 vampire bats examined here), reciprocity is thought to occur in the context of a long-term  
377 cooperative relationship. The existence and strength of an underlying cooperative relationship  
378 must be estimated by sampling many helping events given and received (e.g. allogrooming, food  
379 sharing, or coalitionary support) to calculate dyadic helping rates. When such cooperative  
380 interactions are rare or difficult to observe, these dyadic helping rates will be imprecise measures  
381 of the true cooperative relationship between the individuals. For example, we might have  
382 observed A helping B, but never B helping A, despite the fact that B has helped A in the past, or  
383 may do so in the future.

384         Imprecision in the estimate of helping symmetry will have twice the effect on the ability  
385 to find support for reciprocity because it will affect both the predictor (how much B helps A) and  
386 the response (how much A helps B), whereas it affects nepotism estimates only once through the  
387 response variable (how much A helps B). The sample size of helping observations does not affect  
388 the estimates of kinship, but it does determine the accuracy of the dyadic rates of help given and  
389 received, so fewer helping observations will directly and greatly impact estimates of symmetry,  
390 but not kinship. Even if we observe only one helping event for each dyad, those data could be  
391 sufficient to detect and estimate an existing kinship bias, but we could never use the same data to  
392 detect evidence for reciprocity. If a cooperative relationship exists, then kinship estimates will  
393 generally be more precise than estimates of helping rates (the cooperative relationship).

394         This asymmetry in precision is compounded in larger study populations. The number of  
395 possible dyadic helping rates is almost the square of the number of individuals,  $n*(n-1)$ .  
396 Observing enough dyadic helping interactions to accurately estimate a cooperation network

397 (Farine and Strandburg-Peshkin 2015) is a far greater challenge than estimating pairwise kinship  
398 among the same number of individuals. The former requires many unique behavioral samples per  
399 individual, whereas the latter might require applying the same panel of genetic markers to one  
400 genetic sample per individual. As population size increases, so too does the inequality between  
401 the effort required to estimate helping rates versus pairwise kinship across all dyads. As a result,  
402 the power to detect helping symmetry relative to kinship bias will almost always decrease with  
403 more individuals.

404         Even when kinship plays a less important role than reciprocal help in determining  
405 cooperation, nepotism can essentially overshadow some or all of the evidence of reciprocity,  
406 especially with a smaller sample of events. This is important because observations of costly  
407 helping events, such as food sharing, are often quite rare. For example, more than 400 hours of  
408 focal sampling of wild vampire bats over 26 months of fieldwork yielded 110 observations of  
409 regurgitated food sharing and only 21 observations of non-maternal sharing between adults with  
410 known association and relatedness (Wilkinson 1984). Researchers studying meat sharing in  
411 chimpanzees observed an average of only 1.3 sharing episodes between adult male chimpanzees  
412 per successful hunt (Mitani and Watts 2001). When captive capuchin monkeys were separated by  
413 mesh barrier and given opportunities to share food, observations of 9896 interactions over food  
414 yielded only 18 instances of apparent food sharing and 4 unambiguous cases of one monkey  
415 directly giving food to the other (de Waal 1997a). More frequent interactions such as grooming  
416 are therefore useful for providing a window into cooperative relationships that may drive more  
417 costly helping decisions, but effect sizes based on these most frequent interactions can still be  
418 underpowered despite a surprisingly large numbers of helping events (Figure 1).

419

#### 420 *How to infer power to detect symmetry and kinship bias*

421         The relative precision of the estimates of kinship bias and symmetry are unclear in a  
422 single statistical test. However, as we have shown, one can estimate the relative precision of

423 helping symmetry and kinship bias through resampling methods. Researchers often use  
424 resampling to assess the reliability of genetic marker-based estimates of relatedness (Kalinowski  
425 et al. 2006; Queller and Goodnight 1989; Wang 2011). Similar methods can be used to create  
426 confidence estimates for social relationships (Farine and Strandburg-Peshkin 2015;  
427 Sánchez-Tójar et al. 2018).

428         Our resampling procedure allows one to determine how symmetry and kinship bias  
429 respond to increased sampling. For each effect (kinship and reciprocal help), we used  
430 subsampling and bootstrapping to generate confidence intervals and trajectories with increasing  
431 sampling. By inspecting the resulting plots, one can infer if more power is needed to test a  
432 hypothesis about symmetry or kinship bias. For instance, if the coefficients are on a crossing  
433 trajectory, then more data are required before drawing any conclusions. If the trajectories are  
434 diverging, then more reliable conclusions can be drawn about which predictor is more important,  
435 but not by how much. If the trajectories are stable, this suggests that the precision of the estimate  
436 would probably not be improved with more sampling.

437

438 *Other reasons why reciprocity is hard to detect*

439         We've shown that symmetrical helping rates in a nepotistic population can be hard to  
440 detect for purely statistical reasons. Several biological factors can also make observational  
441 evidence for reciprocity difficult to detect. First, symmetry is more difficult to detect in the  
442 timespan of a short-term study because stable relationships are also expected to have a longer  
443 timescale for reciprocation (Seyfarth and Cheney 2012; Gomes and Boesch 2011; Gomes and  
444 Boesch 2009; Gomes, Mundry, and Boesch 2008; de Waal 1997; Carter and Wilkinson 2013;  
445 Jaeggi et al. 2013; Sabbatini et al. 2012; Schino and Aureli 2017). Strongly bonded individuals  
446 show dyadic helping rates that are more predicted by a foundation of past events and less  
447 predicted by recent events, compared to weakly bonded individuals (de Waal 1997; Seyfarth and  
448 Cheney 2012, 1984; Schino and Aureli 2009; Jaeggi et al. 2013). If individuals invest in

449 relationships for long-term benefits, then a strong social bond might only show symmetry over a  
450 year but not a month or week. Hence, greater social stability makes it harder to detect helping  
451 symmetry over short time periods, whereas lower social stability makes it harder to detect  
452 symmetry over long time periods. The relative importance of recent events versus longer-term  
453 past experience in driving decisions to cooperate is an open question for most behaviors and  
454 species.

455         Second, relationships are not completely stable and can change during the course of a  
456 study. This is generally true for any measure of a social relationship such as dominance or  
457 association rate. Social decisions are also influenced by immediate costs and benefits (Newton-  
458 Fisher & Kaburu, 2017). For instance, one study reported that an alpha male chimpanzee was  
459 attacked and killed by his most strongly affiliated and most frequent grooming partner, that many  
460 observers might label as a ‘friend’ (Kaburu, Inoue, & Newton-Fisher, 2013). Social relationships  
461 can not only change suddenly, but often asynchronously across dyads.

462         Third, in addition to the helping rate, the relative importance of reciprocity and nepotism  
463 for determining the helping rate can change over time. For example, the care invested by a mother  
464 in her two daughters when they are young might be 100% nepotistic and 0% reciprocal, with  
465 equal helping allocated to each daughter. However, when her daughters become adults, the  
466 mother’s investment might also be influenced by each daughter’s reciprocal investment in her,  
467 and she may have a stronger relationship with one daughter over another.

468         Fourth, reciprocity can be more difficult to detect than nepotism because cooperative  
469 returns can take different forms (Fruteau et al. 2009; de Waal and Berger 2000; de Waal 1997;  
470 Gomes and Boesch 2011; Gomes and Boesch 2009; Seyfarth and Cheney 1984; Borgeaud and  
471 Bshary 2015). If each decision to help is based on a weighted sum of different forms of past help,  
472 then any one form of help might not show much symmetry even if the relationship is balanced  
473 when all forms of help are considered. The notion of reciprocity by ‘emotional book-keeping’  
474 (Schino and Aureli 2009), implies that ‘grooming on Tuesday can create an emotional bond that

475 causes meat sharing on Saturday afternoon' (p. 167, Seyfarth and Cheney 2012). Asymmetries in  
476 any one service are expected if subordinates groom more dominant individuals in exchange for  
477 tolerance (Borgeaud and Bshary 2015; Tiddi et al. 2011; Port, Clough, and Kappeler 2009;  
478 Ventura et al. 2006), or if individuals adjust their grooming rates based on the ability of partners  
479 to provide food relative to others (Fruteau et al. 2009). Such asymmetries play a key role in  
480 biological market theory (Noë and Hammerstein 1995, 1994) but pose a problem for simple 'tit-  
481 for-tat' models of reciprocity.

482         Finally, reciprocity and nepotism might interact: the degree of contingency in a reciprocal  
483 relationship may be more or less strict among kin. A negative interaction between contingency  
484 and kinship was observed in cooperatively breeding cichlids where dominants share their nests  
485 with subordinate helpers that must 'pay-to-stay', but subordinates nonkin help more than kin  
486 because dominants tolerate subordinate kin regardless of their degree of alloparental care (Zöttl et  
487 al. 2013). Such differences in reciprocity between kin and nonkin may also exist in primate long-  
488 term cooperative relationships, but they can only be detected through repeated manipulations of  
489 helping among both kin and nonkin.

490

#### 491 *Experimental evidence for simultaneous nepotism and reciprocity*

492         To test the causal roles of reciprocity and nepotism, experiments must manipulate both  
493 the helping history and kinship cues that influence decisions to help. To our knowledge, this has  
494 only been accomplished once using an experimental paradigm where rats are trained to  
495 understand how to pull a bar to deliver a food reward to a partner rat. In a series of experiments,  
496 reciprocity was evident because decisions to pull for a partner were influenced by factors such as  
497 past food received or allogrooming received from the partner (Rutte and Taborsky 2008;  
498 Schweinfurth and Taborsky 2018a). To test for a simultaneous kinship effect, outbred wild-type  
499 male rats were separated from littermates, housed with non-kin, tested for an ability to recognize  
500 kin, and then tested in the same food-pulling task with partners that varied in both their past

501 reciprocal help and kinship (Schweinfurth and Taborsky 2018b). The rats demonstrated kin  
502 discrimination by preferring to associate with unfamiliar kin over unfamiliar nonkin, but they did  
503 not show nepotism in the food pulling task; kinship did not increase food pulling nor did it  
504 change the symmetry of reciprocal pulling rates (Schweinfurth and Taborsky 2018b).

505

506 *When is nepotism harder to detect than symmetry?*

507         There are also several conditions under which nepotism is unlikely to be detected relative  
508 to reciprocity, such as when kinship estimates are inaccurate or when there is insufficient  
509 variation in kinship among dyads (Csilléry et al. 2006). Although genetic and genomic data is  
510 becoming cheaper, easier, and more available (Städele and Vigilant 2016), kinship estimates  
511 based on genetic data can still be quite imprecise (Csilléry et al. 2006; Pemberton 2008; van Horn,  
512 Altmann, and Alberts 2008). Second, relatedness estimates become severely biased using allele  
513 frequencies calculated from only a few animals (Wang 2017). If genetic samples are used to score  
514 relatedness in a small subset of individuals, it is crucial to calculate the baseline population allele  
515 frequencies from a much larger sample. In studies using pedigrees based on births, ‘kinship’ is  
516 actually maternal kinship. These estimates may be ecologically valid if the animals themselves  
517 cannot recognize paternal kin, but increasing evidence suggests that some primates for instance  
518 can recognize unfamiliar paternal kin (Levréro et al. 2015; Charpentier et al. 2007).

519         Although helping rates are less precise than kinship estimates, association rates might  
520 often be more precise than kinship estimates if dyadic association rates are based on automated  
521 methods that can involve many thousands of observations (Aplin et al. 2015; Alarcón - Nieto et  
522 al. 2018). In such cases, the social networks could be described more accurately than the genetic  
523 relationships, and association will be easier to detect than kinship as a predictor of cooperation.

524

525 *Quantifying if and how nepotism contributes to symmetrical helping in network data*



526           If both reciprocity and nepotism exist, decomposing the inclusive fitness benefits of a  
527 cooperative trait into the relative fitness and indirect fitness components is implausible using  
528 empirical observational data. On the other hand, both controlled experiments and some  
529 observational analyses can help to identify the relative roles of different proximate mechanisms.  
530 Experiments can directly identify the relative importance of different conflicting cues used to  
531 make helping decisions (Schweinfurth and Taborsky 2018b). Observational studies can also play  
532 an important role in looking at what proximate factors best predict cooperation in nature by  
533 investigating how cooperation network structures arise. For example, consider two hypotheses. In  
534 the first, kinship determines proximity, which then determines symmetrical grooming. In the  
535 second, individuals associate in space independent of kinship, but they preferentially groom their  
536 kin. Recent developments in social network analysis (Farine and Whitehead 2015) and null  
537 models (Farine 2017) can provide potentially useful tools for distinguishing between such  
538 scenarios by constructing different mechanistic networks (VanderWaal et al. 2014; Ilany and  
539 Akçay 2016) or by constructing different null models that allow different aspects of associations  
540 to vary (Farine et al. 2015). Linking these models to tests of symmetry and kinship bias could  
541 yield greater insights into whether kinship or past experience shape patterns of helping directly or  
542 via more simple processes (Puga-Gonzalez, Hoscheid, and Hemelrijk 2015).

543           Ultimately, patterns generated by reciprocal helping should have a temporal signature in  
544 that helping given should reflect some degree of helping received in the past. However, as we  
545 noted above, a major challenge is determining over what timeframe reciprocity takes place in a  
546 stable cooperative relationship. Few studies to date are likely to have a sufficiently complete  
547 dataset of helping behaviors to use temporal analyses. However, once such data are available,  
548 temporal social network analysis (Pinter-Wollman et al. 2013; Blonder et al. 2012; Farine 2018)  
549 could provide useful tools for investigating these topics.

550

551 *Practical recommendations*

552           When testing simultaneously for evidence of nepotism and reciprocity in cooperation  
553 networks, researchers should be aware of the necessity to estimate the reliability of estimates of  
554 both kinship and helping rates (the network edge weights) before comparing their relative  
555 importance. The most obvious way to improve inferences is to collect more interactions and to  
556 estimate kinship using more pedigree or genetic data. Adding more individuals, however, cannot  
557 compensate for a lack of repeated measures of the same individuals, which is what determines the  
558 precision of network edge weights (Farine & Strandburg-Peshkin 2015). One way to increase  
559 such repeated measures is to induce acts of cooperation. For example allogrooming can be  
560 induced by applying substances to the fur (Hemelrijk 1994; Schweinfurth, Stieger, and Taborsky  
561 2017), cooperative mobbing can be induced with fake predators (Krams et al. 2013; Krama et al.  
562 2012; Krams et al. 2010; Krams et al. 2008), food sharing can be induced by fasting individuals  
563 (Carter and Wilkinson 2013; Wilkinson 1984) or by creating opportunities to provide (Silk et al.  
564 2013).

565           We used network permutations which account for the network structure and hold the total  
566 help given and received by each individual constant. However, network permutations do not  
567 account for biased sampling, so the helping rates (network edge weights) must take into account  
568 the relative opportunity for individuals to help each other. We accomplished this by defining edge  
569 weights as the proportion of help received from individual X divided by the total help received  
570 from all other individuals that could have otherwise come from individual X because X was  
571 present at the time. Another possibility is to define edges as the help from X over the opportunity  
572 for X to help. If helping events are scored as yes/no events, then an even more rigorous approach  
573 is to use pre-network permutations (Farine 2017), where the helping acts in the dataset are  
574 permuted across individuals present at the time, rather than permuting the helping rates in the  
575 network. Pre-network permutations allow for precise control over the null hypothesis by  
576 swapping within time periods or locations, and also control for biased sampling; however, they  
577 are most appropriate when the helping events are binary (0/1) and hence interchangeable. In

578 conclusion, due to differences in the ease of detecting symmetry and kinship bias, it is useful to  
579 assess the reliability of each effect as a function of sampling effort. We provide R code (Carter et  
580 al. 2018) to produce plots that allow one to assess the relative power for detecting evidence of  
581 nepotism and reciprocity in simulated datasets or in a given dataset of helping observations in  
582 humans or nonhuman animals.

583

## 584 **Acknowledgements**

585 We thank T Chen, I Hamilton, J Massen, and an anonymous reviewer for constructive  
586 feedback which improved the manuscript. We thank the Rome Zoo (Bioparco) for allowing us to  
587 study their Japanese macaque and mandrill colonies, and Francesca Lasio and Raffaella Ventura  
588 for help with the data collection. GGC was supported by fellowships from the Smithsonian  
589 Institute and the Humboldt Foundation. DRF was funded by the Max Planck Society.

590

## 591 **References**

592

- 593 Abernethy, Katherine A, Lee JT White, and E Jean Wickings. 2002. 'Hordes of mandrills  
594 (*Mandrillus sphinx*): extreme group size and seasonal male presence', *Journal of*  
595 *Zoology*, 258: 131-37.
- 596 Alarcón-Nieto, Gustavo, Jacob M Graving, James A Klarevas-Irby, Adriana A  
597 Maldonado-Chaparro, Inge Mueller, and Damien R Farine. 2018. 'An automated  
598 barcode tracking system for behavioural studies in birds', *Methods in Ecology and*  
599 *Evolution*, 9: 1536-47.
- 600 Aplin, Lucy M, Damien R Farine, Julie Morand-Ferron, Andrew Cockburn, Alex  
601 Thornton, and Ben C Sheldon. 2015. 'Experimentally induced innovations lead to  
602 persistent culture via conformity in wild birds', *Nature*, 518: 538-41.
- 603 Axelrod, R., and W. D. Hamilton. 1981. 'The evolution of cooperation', *Science*, 211:  
604 1390-96.
- 605 Balasubramaniam, Krishna N, Brianne A Beisner, Carol M Berman, Arianna De Marco,  
606 Julie Duboscq, Sabina Koirala, Bonaventura Majolo, Andrew J MacIntosh,  
607 Richard McFarland, and Sandra Molesti. 2018. 'The influence of phylogeny,  
608 social style, and sociodemographic factors on macaque social network structure',  
609 *American Journal of Primatology*, 80.
- 610 Blonder, Benjamin, Tina W. Wey, Anna Dornhaus, Richard James, and Andrew Sih.  
611 2012. 'Temporal dynamics and network analysis', *Methods in Ecology and*  
612 *Evolution*, 3: 958-72.

- 613 Borgeaud, Christele, and Redouan Bshary. 2015. 'Wild vervet monkeys trade tolerance  
614 and specific coalitionary support for grooming in experimentally induced  
615 conflicts', *Current Biology*, 25: 3011-16.
- 616 Bret, Celine, Cedric Sueur, Barthelemy Ngoubangoye, Delphine Verrier, Jean-Louis  
617 Deneubourg, and Odile Petit. 2013. 'Social structure of a semi-free ranging group  
618 of mandrills (*Mandrillus sphinx*): a social network analysis', *Plos One*, 8: e83015.
- 619 Bshary, R, and R Bergmüller. 2008. 'Distinguishing four fundamental approaches to the  
620 evolution of helping', *Journal of Evolutionary Biology*, 21: 405-20.
- 621 Carter, G. G., and G. S. Wilkinson. 2013. 'Food sharing in vampire bats: reciprocal help  
622 predicts donations more than relatedness or harassment', *Proceedings of the Royal  
623 Society B*, 280: 20122573.
- 624 ———. 2015. 'Social benefits of non-kin food sharing by female vampire bats',  
625 *Proceedings of the Royal Society B*, 282: 20152524-24.
- 626 Carter, G.G. 2014. 'The reciprocity controversy', *Animal Behavior and Cognition*, 1: 368-  
627 86.
- 628 Carter, Gerald G, Gabriele Schino, and Damien R Farine. 2018a. "R code for "Nepotism  
629 masks evidence for reciprocity in cooperation networks". In *Figshare*.
- 630 Carter, Gerald, Gabriele Schino, and Damien R Farine. 2018b. "Data for "Nepotism  
631 masks evidence of reciprocity in cooperation networks". In *Figshare*.
- 632 Charpentier, Marie JE, Patricia Peignot, Martine Hossaert-McKey, and E Jean Wickings.  
633 2007. 'Kin discrimination in juvenile mandrills, *Mandrillus sphinx*', *Animal  
634 Behaviour*, 73: 37-45.
- 635 Clutton-Brock, T. 2009. 'Cooperation between non-kin in animal societies', *Nature*, 462:  
636 51-57.
- 637 Cornwallis, CK, SA West, and AS Griffin. 2009. 'Routes to indirect fitness in  
638 cooperatively breeding vertebrates: kin discrimination and limited dispersal',  
639 *Journal of Evolutionary Biology*, 22: 2445-57.
- 640 Csilléry, Katalin, Toby Johnson, Dario Beraldi, Tim Clutton-Brock, Dave Coltman,  
641 Bengt Hansson, Goran Spong, and Josephine M Pemberton. 2006. 'Performance  
642 of marker-based relatedness estimators in natural populations of outbred  
643 vertebrates.', *Genetics*, 173: 2091-101.
- 644 de Waal, F. B., and M. L. Berger. 2000. 'Payment for labour in monkeys', *Nature*, 404:  
645 563.
- 646 de Waal, F. B. M. 1997. 'The chimpanzee's service economy: food for grooming',  
647 *Evolution and Human Behavior*, 18: 375-86.
- 648 de Waal, F. B. M., and S. F Brosnan. 2006. 'Simple and complex reciprocity in primates.'  
649 in P.M. Kappeler and C. P. van Schaik (eds.), *Cooperation in primates and  
650 humans: Mechanisms and evolution* (Springer: Berlin).
- 651 Dekker, David, David Krackhardt, and Tom AB Snijders. 2007. 'Sensitivity of MRQAP  
652 tests to collinearity and autocorrelation conditions', *Psychometrika*, 72: 563-81.
- 653 Dolivo, V., and M. Taborsky. 2015. 'Norway rats reciprocate help according to the  
654 quality of help they received', *Biology Letters*, 11: 20140959.
- 655 Engelhardt, Sacha C, Robert B Weladji, Øystein Holand, Knut H Røed, and Mauri  
656 Nieminen. 2015. 'Evidence of reciprocal allonursing in reindeer, Rangifer  
657 tarandus', *Ethology*, 121: 245-59.

- 658 Farine, Damien R. 2013. 'Animal social network inference and permutations for  
659 ecologists in Rusing asnipe', *Methods in Ecology and Evolution*, 4: 1187-94.  
660 ———. 2015. 'Proximity as a proxy for interactions: issues of scale in social network  
661 analysis', *Animal Behaviour*, 104: e1-e5.  
662 ———. 2018. 'When to choose dynamic vs. static social network analysis', *Journal of*  
663 *Animal Ecology*, 87: 128-38.
- 664 Farine, Damien R, Josh A Firth, Lucy M Aplin, Ross A Crates, Antica Culina, Colin J  
665 Garroway, Camilla A Hinde, Lindall R Kidd, Nicole D Milligan, and Ioannis  
666 Psorakis. 2015. 'The role of social and ecological processes in structuring animal  
667 populations: a case study from automated tracking of wild birds', *Royal Society*  
668 *Open Science*, 2: 150057.
- 669 Farine, Damien R, and Ariana Strandburg-Peshkin. 2015. 'Estimating uncertainty and  
670 reliability of social network data using Bayesian inference', *Royal Society Open*  
671 *Science*, 2: 150367.
- 672 Farine, Damien R, and Hal Whitehead. 2015. 'Constructing, conducting and interpreting  
673 animal social network analysis', *Journal of Animal Ecology*, 84: 1144-63.
- 674 Farine, Damien R. 2017. 'A guide to null models for animal social network analysis',  
675 *Methods in Ecology and Evolution*, 8: 1309-20.
- 676 Fruteau, C, B Voelkl, E van Damme, and R Noë. 2009. 'Supply and demand determine  
677 the market value of food providers in wild vervet monkeys', *Proceedings of the*  
678 *National Academy of Sciences of the United States of America*, 106: 12007-12.
- 679 Gomes, Cristina M, and Christophe Boesch. 2011. 'Reciprocity and trades in wild West  
680 African chimpanzees', *Behavioral Ecology and Sociobiology*, 65: 2183-96.
- 681 Gomes, Cristina M, Roger Mundry, and Christophe Boesch. 2008. 'Long-term  
682 reciprocation of grooming in wild West African chimpanzees', *Proceedings of the*  
683 *Royal Society B*, 276: 699-706.
- 684 Gomes, Cristina M., and Christophe Boesch. 2009. 'Wild chimpanzees exchange meat for  
685 sex on a long-term basis', *Plos One*, 4: e5116.
- 686 Griffin, A.S., and S.A. West. 2003. 'Kin discrimination and the benefit of helping in  
687 cooperatively breeding vertebrates', *Science*, 302: 634-36.
- 688 Hamilton, W D. 1964. 'The genetical evolution of social behavior', *Journal of Theoretical*  
689 *Biology*, 7: 1-51.
- 690 Hemelrijk, Charlotte K. 1994. 'Support for being groomed in long-tailed macaques,  
691 *Macaca fascicularis*', *Animal Behaviour*, 48: 479-81.
- 692 Ilany, Amiyaal, and Erol Akçay. 2016. 'Social inheritance can explain the structure of  
693 animal social networks', *Nature Communications*, 7: 12084.
- 694 Jaeggi, Adrian V, Evelien De Groot, Jeroen MG Stevens, and Carel P van Schaik. 2013.  
695 'Mechanisms of reciprocity in primates: testing for short-term contingency of  
696 grooming and food sharing in bonobos and chimpanzees', *Evolution and Human*  
697 *Behavior*, 34: 69-77.
- 698 Jaeggi, Adrian V, and Michael Gurven. 2013. 'Reciprocity explains food sharing in  
699 humans and other primates independent of kin selection and tolerated scrounging:  
700 a phylogenetic meta-analysis', *Proceedings of the Royal Society B*, 280: 20131615.
- 701 Jaeggi, Adrian V, Paul L Hooper, Bret A Beheim, Hillard Kaplan, and Michael Gurven.  
702 2016. 'Reciprocal exchange patterned by market forces helps explain cooperation  
703 in a small-scale society', *Current Biology*, 26: 2180-87.

- 704 Koster, Jeremy. 2011. 'Interhousehold meat sharing among Mayangna and Miskito  
705 horticulturalists in Nicaragua', *Human Nature*, 22: 394-415.
- 706 Krama, Tatjana, Jolanta Vrublevska, Todd M Freeberg, Cecilia Kullberg, Markus J  
707 Rantala, and Indrikis Krams. 2012. 'You mob my owl, I'll mob yours: birds play  
708 tit-for-tat game.', *Scientific Reports*, 2: 800.
- 709 Krams, I., A. Berzins, T. Krama, D. Wheatcroft, K. Igaune, and M. J. Rantala. 2010. 'The  
710 increased risk of predation enhances cooperation', *Proceedings of the Royal  
711 Society B*, 277: 513-18.
- 712 Krams, I., H. Kokko, J. Vrublevska, M. Abolins-Abols, T. Krama, and M. J. Rantala.  
713 2013. 'The excuse principle can maintain cooperation through forgivable  
714 defection in the Prisoner's Dilemma game', *Proceedings of the Royal Society B*,  
715 280: 20131475.
- 716 Krams, I., T. Krama, K. Igaune, and R. Mand. 2008. 'Experimental evidence of reciprocal  
717 altruism in the pied flycatcher', *Behavioral Ecology and Sociobiology*, 62: 599-  
718 605.
- 719 Lehmann, L., and L. Keller. 2006. 'The evolution of cooperation and altruism - a general  
720 framework and a classification of models', *Journal of Evolutionary Biology*, 19:  
721 1365-76.
- 722 Levréro, F, G Carrete-Vega, A Herbert, I Lawabi, A Courtiol, E Willaume, PM Kappeler,  
723 and MJE Charpentier. 2015. 'Social shaping of voices does not impair phenotype  
724 matching of kinship in mandrills', *Nature Communications*, 6: 7609.
- 725 Noë, R. 2006. 'Cooperation experiments: coordination through communication versus  
726 acting apart together', *Animal Behaviour*, 71: 1-18.
- 727 Noë, R., and P. Hammerstein. 1994. 'Biological markets: supply and demand determine  
728 the effect of partner choice in cooperation, mutualism and mating', *Behavioral  
729 Ecology and Sociobiology*, 35: 1-11.
- 730 ———. 1995. 'Biological markets', *Trends in Ecology and Evolution*, 10: 336-39.
- 731 Pemberton, J M. 2008. 'Wild pedigrees: the way forward', *Proceedings of the Royal  
732 Society B*, 275: 613-21.
- 733 Pinter-Wollman, Noa, Elizabeth A Hobson, Jennifer E Smith, Andrew J Edelman,  
734 Daizaburo Shizuka, Shermin de Silva, James S Waters, Steven D Prager, Takao  
735 Sasaki, George Wittemyer, Jennifer Fewell, and David B McDonald. 2013. 'The  
736 dynamics of animal social networks: analytical, conceptual, and theoretical  
737 advances', *Beh. Ecol.*, 25: 242-55.
- 738 Port, M., D. Clough, and P. M. Kappeler. 2009. 'Market effects offset the reciprocation of  
739 grooming in free-ranging redfronted lemurs, *Eulemur fulvus rufus*', *Animal  
740 Behaviour*, 77: 29-36.
- 741 Puga-Gonzalez, Ivan, Anne Hoscheid, and Charlotte K Hemelrijk. 2015. 'Friendship,  
742 reciprocation, and interchange in an individual-based model', *Behavioral Ecology  
743 and Sociobiology*: 1-12.
- 744 Rutte, C., and M. Taborsky. 2008. 'The influence of social experience on cooperative  
745 behaviour of rats (*Rattus norvegicus*): direct vs generalised reciprocity',  
746 *Behavioral Ecology and Sociobiology*, 62: 499-505.
- 747 Sabbatini, G, A De Bortoli Vizioli, E Visalberghi, and G Schino. 2012. 'Food transfers in  
748 capuchin monkeys: an experiment on partner choice', *Biology Letters*, 8: 757-59.

- 749 Schino, G., and F. Aureli. 2009. 'Reciprocal altruism in primates: partner choice,  
750 cognition, and emotions', *Advances in the Study of Behavior*, 39: 45-69.
- 751 ———. 2010a. 'A few misunderstandings about reciprocal altruism', *Communicative and*  
752 *Integrative Biology*, 3: 561-63.
- 753 Schino, Gabriele, and Filippo Aureli. 2010b. 'Primate reciprocity and its cognitive  
754 requirements', *Evolutionary Anthropology: Issues, News, and Reviews*, 19: 130-35.
- 755 ———. 2010c. 'The relative roles of kinship and reciprocity in explaining primate  
756 altruism', *Ecology Letters*, 13: 45-50.
- 757 ———. 2017. 'Reciprocity in group-living animals: Partner control versus partner choice',  
758 *Biological Reviews*, 92: 665-72.
- 759 Schino, Gabriele, and Barbara Pellegrini. 2009. 'Grooming in mandrills and the time  
760 frame of reciprocal partner choice', *American Journal of Primatology*, 71: 884-88.
- 761 Schweinfurth, Manon K, Binia Stieger, and Michael Taborsky. 2017. 'Experimental  
762 evidence for reciprocity in allogrooming among wild-type Norway rats', *Scientific*  
763 *Reports*, 7: 4010.
- 764 Schweinfurth, Manon K, and Michael Taborsky. 2018a. 'Reciprocal trading of different  
765 commodities in Norway rats', *Current Biology*, 28: 1-6.
- 766 Schweinfurth, Manon K., and Michael Taborsky. 2018b. 'Relatedness decreases and  
767 reciprocity increases cooperation in Norway rats', *Proceedings of the Royal*  
768 *Society B*, 285.
- 769 Schweinfurth, MK, J Neuenschwander, L Engqvist, K Schneeberger, AK Rentsch, M  
770 Gyax, and M Taborsky. 2017. 'Do female Norway rats form social bonds?',  
771 *Behavioral Ecology and Sociobiology*, 71: 98.
- 772 Seyfarth, R. M., and D. L. Cheney. 1984. 'Grooming, alliances and reciprocal altruism in  
773 vervet monkeys', *Nature*, 308: 541-43.
- 774 ———. 2012. 'The evolutionary origins of friendship', *Annual Review of Psychology*, 63:  
775 153-77.
- 776 Silk, Joan B, Sarah F Brosnan, Joseph Henrich, Susan P Lambeth, and Steven Shapiro.  
777 2013. 'Chimpanzees share food for many reasons: The role of kinship, reciprocity,  
778 social bonds and harassment on food transfers', *Animal Behaviour*, 85: 941-47.
- 779 Städele, Veronika, and Linda Vigilant. 2016. 'Strategies for determining kinship in wild  
780 populations using genetic data', *Ecology and Evolution*, 6: 6107-20.
- 781 Taborsky, Michael, Joachim G Frommen, and Christina Riehl. 2016. 'Correlated pay-offs  
782 are key to cooperation', *Philosophical Transactions of The Royal Society B*, 371:  
783 20150084.
- 784 Thomas, Matthew Gwynfryn, Ting Ji, Jiajia Wu, QiaoQiao He, Yi Tao, and Ruth Mace.  
785 2018. 'Kinship underlies costly cooperation in Mosuo villages', *Royal Society*  
786 *Open Science*, 5: 171535.
- 787 Tiddi, Barbara, Filippo Aureli, Eugenia Polizzi di Sorrentino, Charles H Janson, and  
788 Gabriele Schino. 2011. 'Grooming for tolerance? Two mechanisms of exchange in  
789 wild tufted capuchin monkeys', *Beh. Ecol.*, 22: 663-69.
- 790 Trivers, R L. 1971. 'The evolution of reciprocal altruism', *Quarterly Review of Biology*,  
791 46: 35-57.
- 792 Van Cleve, Jeremy, and Erol Akçay. 2014. 'Pathways to social evolution: reciprocity,  
793 relatedness, and synergy', *Evolution*, 68: 2245-58.

- 794 van Horn, Russell C, Jeanne Altmann, and Susan C Alberts. 2008. 'Can't get there from  
795 here: inferring kinship from pairwise genetic relatedness', *Animal Behaviour*, 75:  
796 1173-80.
- 797 VanderWaal, Kimberly L, Edward R Atwill, Lynne A Isbell, and Brenda McCowan.  
798 2014. 'Linking social and pathogen transmission networks using microbial  
799 genetics in giraffe (*Giraffa camelopardalis*)', *Journal of Animal Ecology*, 83: 406-  
800 14.
- 801 Ventura, Raffaella, Bonaventura Majolo, Nicola F Koyama, Scott Hardie, and Gabriele  
802 Schino. 2006. 'Reciprocation and interchange in wild Japanese macaques:  
803 grooming, cofeeding, and agonistic support', *American Journal of Primatology*,  
804 68: 1138-49.
- 805 Wang, J. 2017. 'Estimating pairwise relatedness in a small sample of individuals',  
806 *Heredity*, 119: 302.
- 807 West, S, A Griffin, and A Gardner. 2007a. 'Evolutionary Explanations for Cooperation',  
808 *Current Biology*, 17: R661-R72.
- 809 West, S. A., A. S. Griffin, and A. Gardner. 2007b. 'Social semantics: altruism,  
810 cooperation, mutualism, strong reciprocity and group selection', *Journal of*  
811 *Evolutionary Biology*, 20: 415-32.
- 812 Wilkinson, G. S. 1984. 'Reciprocal food sharing in the vampire bat', *Nature*, 308: 181-84.
- 813 Wilkinson, Gerald S. 1988. 'Reciprocal altruism in bats and other mammals', *Ethology*  
814 *and Sociobiology*, 9: 85-100.
- 815 Wright, Brianna M, Eva H Stredulinsky, Graeme M Ellis, and John KB Ford. 2016. 'Kin-  
816 directed food sharing promotes lifetime natal philopatry of both sexes in a  
817 population of fish-eating killer whales, *Orcinus orca*', *Animal Behaviour*, 115: 81-  
818 95.
- 819 Zöttl, M, D Heg, N Chervet, and M Taborsky. 2013. 'Kinship reduces alloparental care  
820 in cooperative cichlids where helpers pay-to-stay', *Nature Communications*, 4:  
821 1341.  
822

823

824

825 Appendix

826 Gerald G. Carter, Gabriele Schino, Damien Farine

827 **R code can be found here:**

828 <https://doi.org/10.6084/m9.figshare.6072272.v2>

829

830 **Datasets can be found here:**

831 <https://doi.org/10.6084/m9.figshare.6072254.v2>

832

833

834 The R function “infer\_power\_reciprocity\_kinship” uses the following arguments:

835

836

837

838

- **individuals:** a vector with unique IDs for all individuals in the study
- **observations:** a data frame with columns: actor, receiver, duration, possible.actors.list
- **possible.actors:** a matrix where each column contains a list of possible actors for each observation. The number of rows is the max number of possible actors.



- 839
- 840
- 841
- 842
- 843
- 844
- 845
- 846
- 847
- 848
- 849
- **relatedness**: a matrix of relatedness between all individuals - row and column orders must match the order of individuals
  - **nreps**: number of repeated subsamples at each sample size
  - **jumps**: number of observations to increment each sample size step (default = 20). First sample size is always 20.
  - **simulate\_data**: if set to “TRUE”, the function will simulate data. If set to “FALSE” then the function will use actual data provided by arguments above.
  - **nepotism** (only used with simulated data): degree of nepotism (0 to 1)
  - **N** (only used with simulated data): number of simulated individuals
  - **n.events** (only used with simulated data): number of simulated helping events

850 Note: Depending on the number of observations and replications, this function can take several

851 hours to run.

852

853 **Table S1. Mean correlation between social bond strength and kinship in simulated data.**

854 Values based on 10,000 simulations. Social bond strength is always symmetric and determines

855 probability and duration of observed helping events.

856

| <b>Nepotism</b> | <b>Mean Pearson’s correlation (0.025 – 0.975 quantiles)</b> |
|-----------------|-------------------------------------------------------------|
| 0%              | 0 (-0.14—0.14)                                              |
| 25%             | 0.32 (0.19—0.44)                                            |
| 50%             | 0.71 (0.64—0.76)                                            |
| 75%             | 0.95 (0.94—0.96)                                            |
| 100%            | 1 (1—1)                                                     |

857

858

859  
860  
861

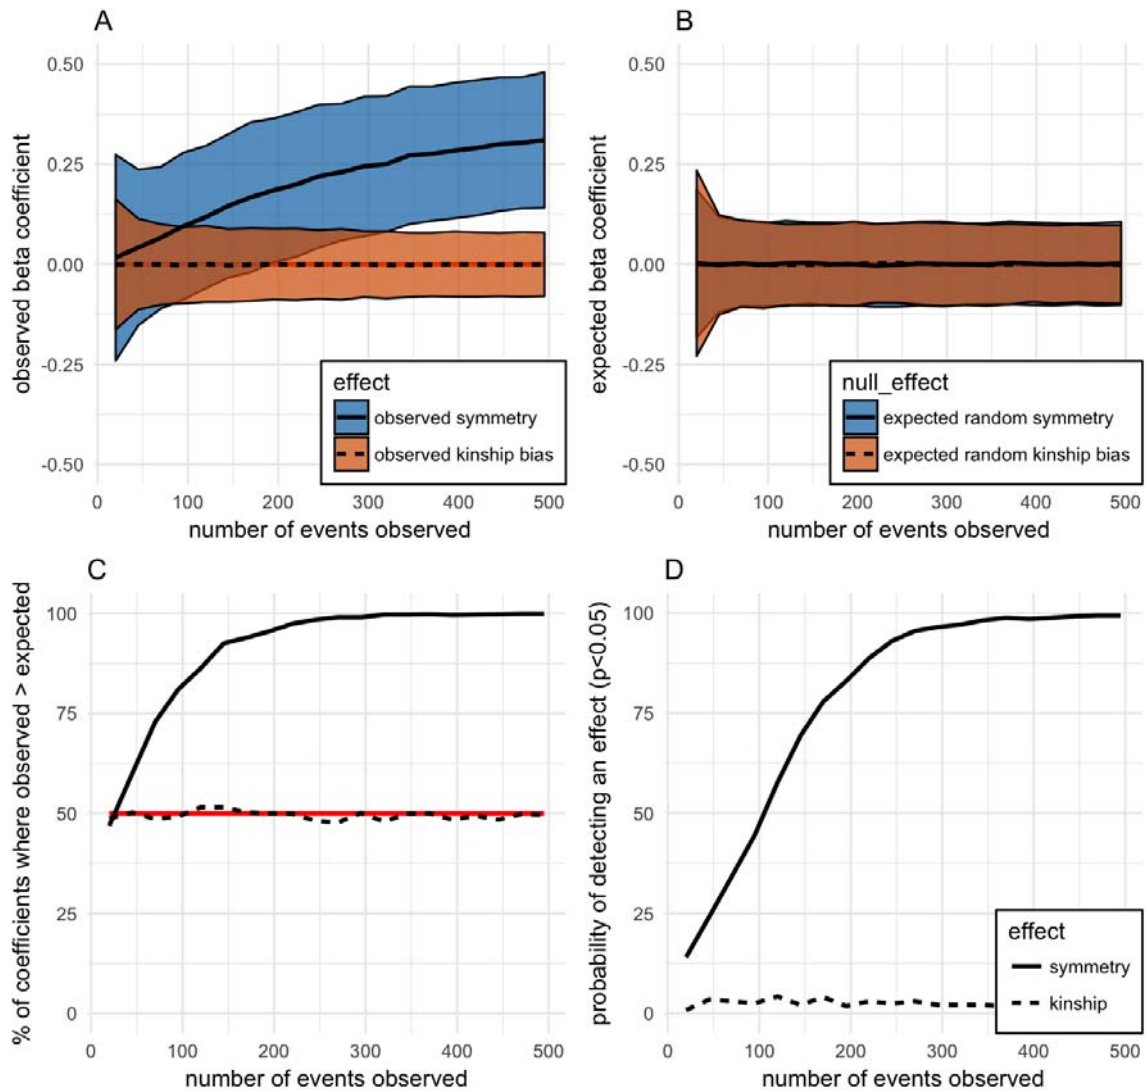

862  
863  
864  
865  
866  
867  
868  
869  
870

**Figure S1. Power analysis for simulation of symmetrical helping with 0% nepotism.** Panel A shows the mean and 95% confidence interval of the standardized slope estimates for the effects of helping rate A to B (solid line, purple shading) and kinship between A and B (dotted line, yellow shading) as predictors of helping rate B to A. Panel B shows the same for the expected null coefficients generated by permutation. Panel C shows the percentage of observed coefficients that are greater than the paired null coefficient generated from the same subsample. If effects are real, then these values should be higher than 50% (red line). Panel D shows the percentage of observed coefficients that are greater than 95% of expected null coefficients for that sample size.

871

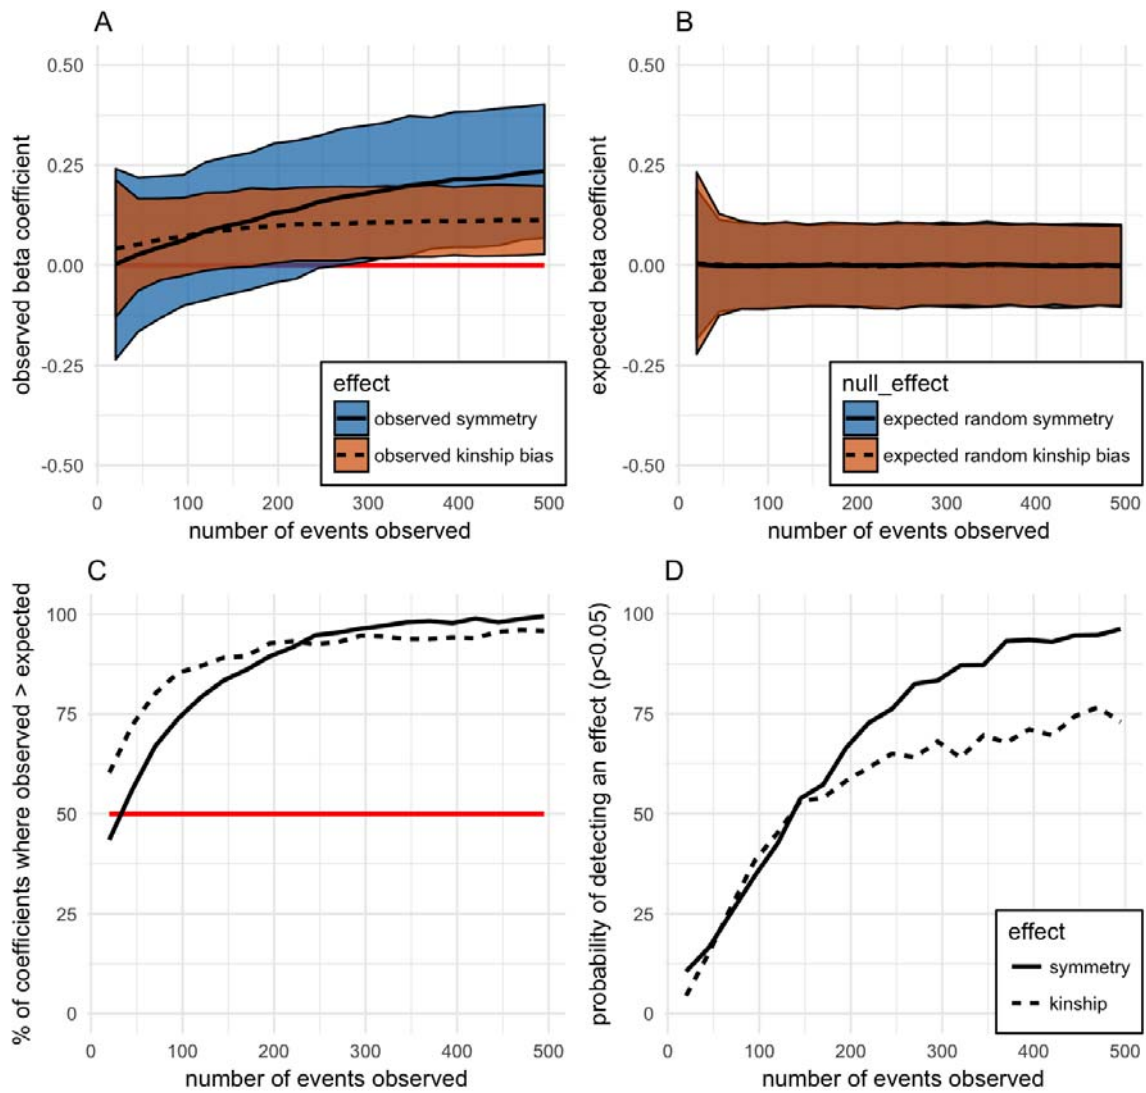

872  
873  
874  
875  
876

**Figure S2. Power analysis for simulation of symmetrical helping with 25% nepotism. See plot Figure S2 for explanation.**

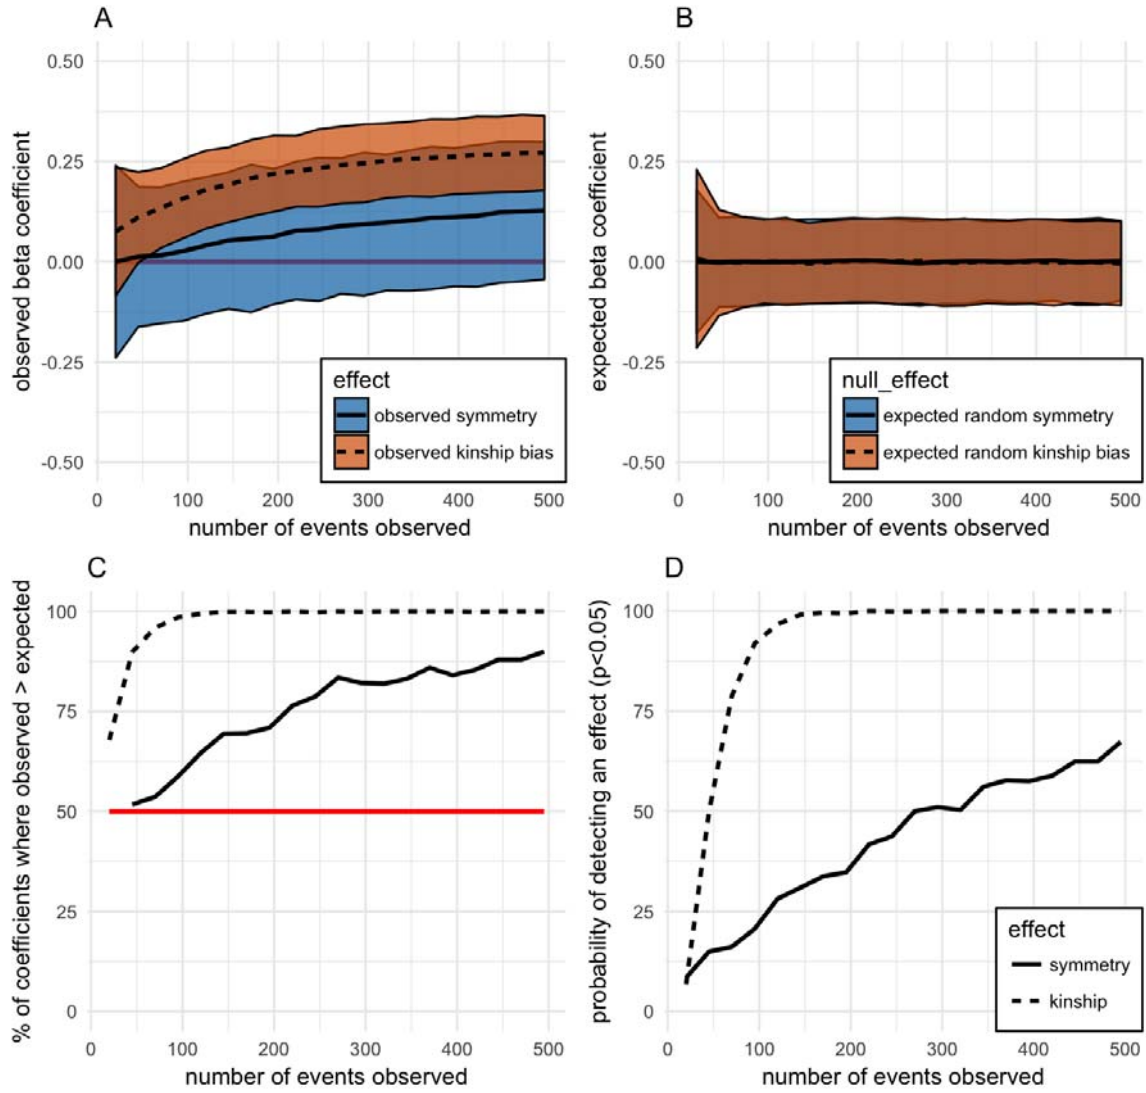

877  
878  
879  
880

**Figure S3. Power analysis for simulation of symmetrical helping with 50% nepotism.** See plot Figure S3 for explanation.

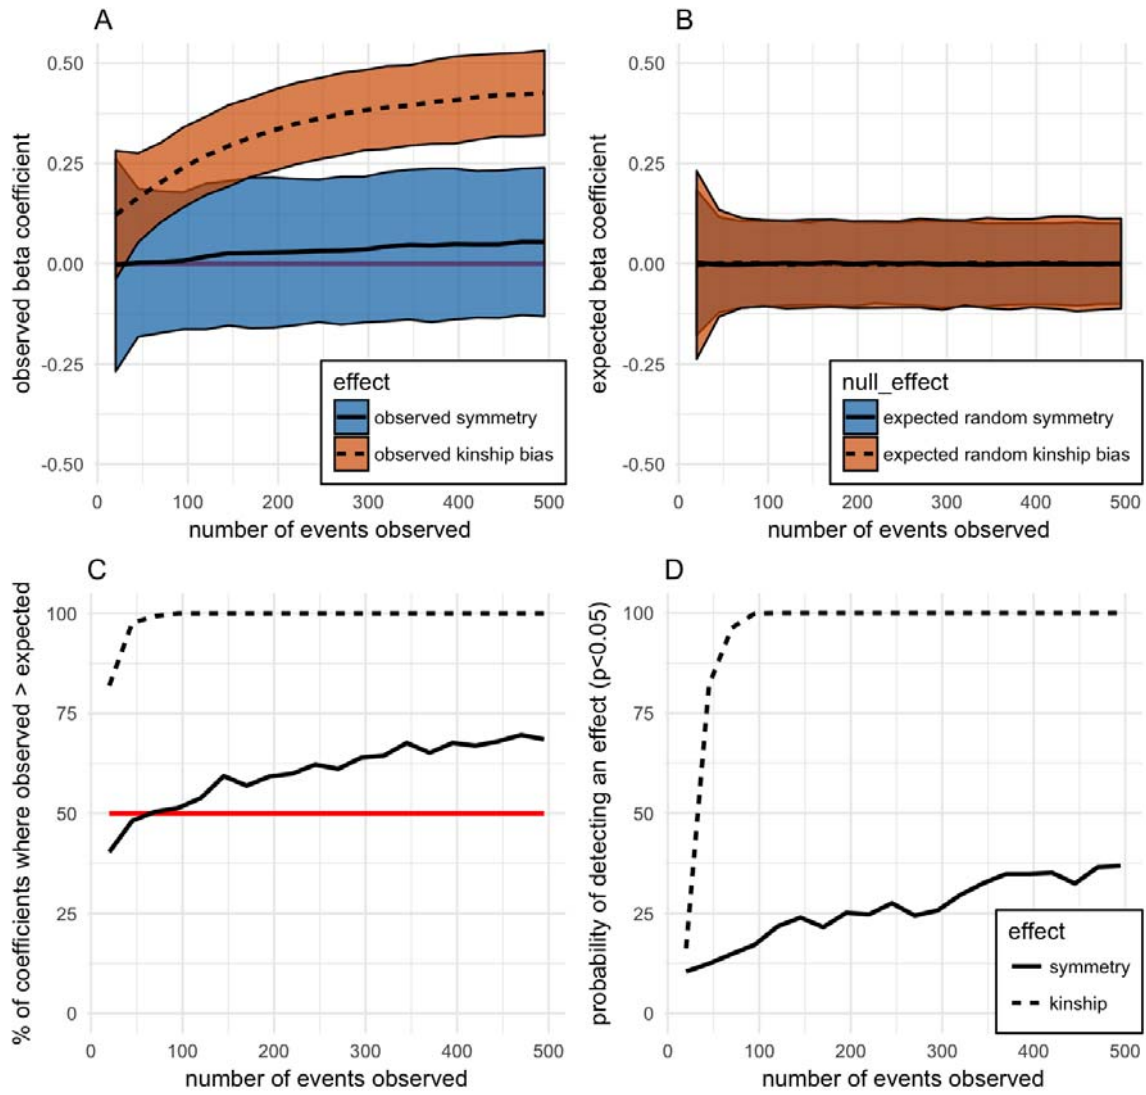

881  
882  
883  
884  
885

**Figure S4. Power analysis for simulation of symmetrical helping with 75% nepotism. See plot Figure S4 for explanation.**

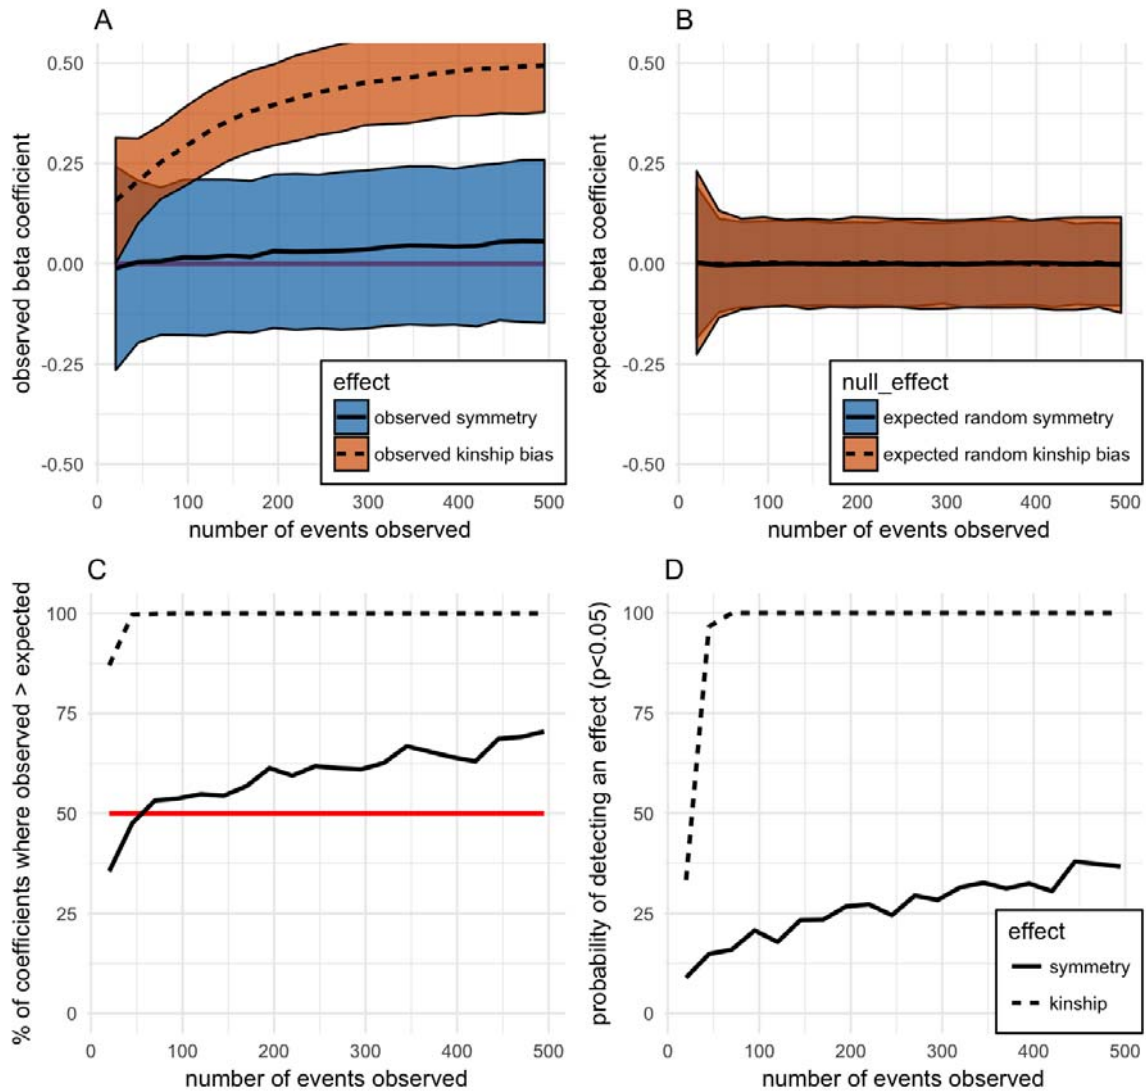

886  
887  
888  
889  
890

**Figure S5. Power analysis for simulation of symmetrical helping with 100% nepotism.** See plot Figure S5 for explanation.

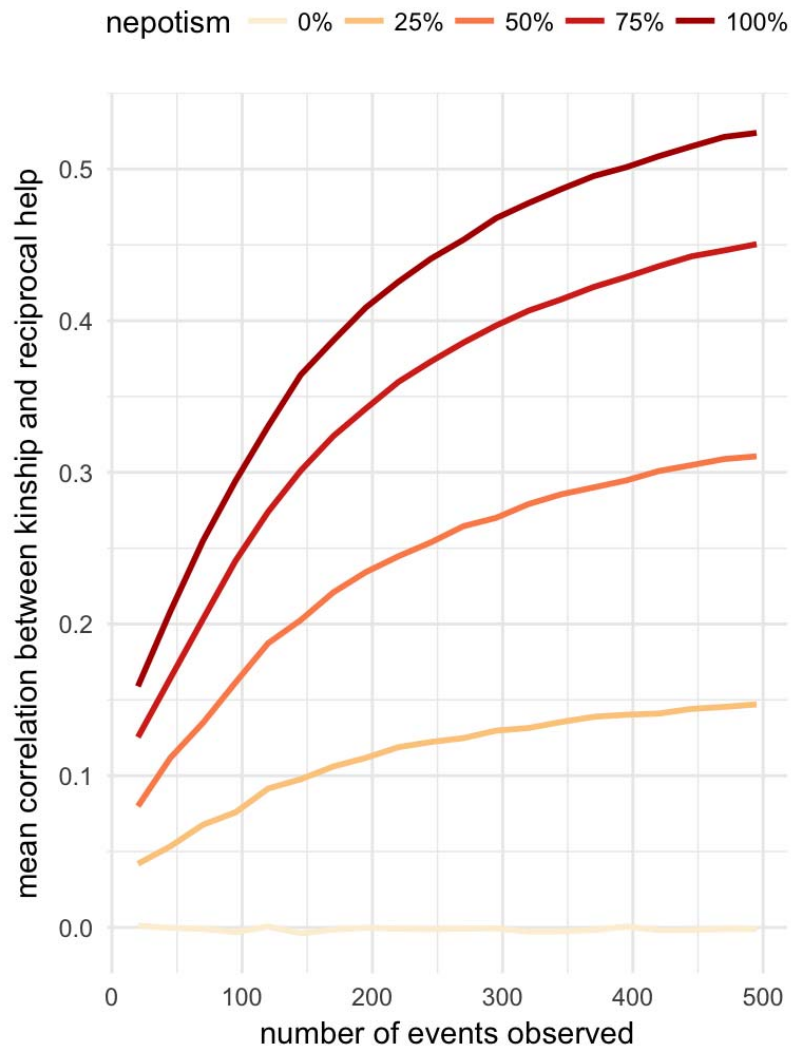

891  
892  
893  
894  
895

**Figure S6. Collinearity.** Mean Pearson's R correlation between the predictors kinship and reciprocal help for each degree of nepotism with increased sampling effort.

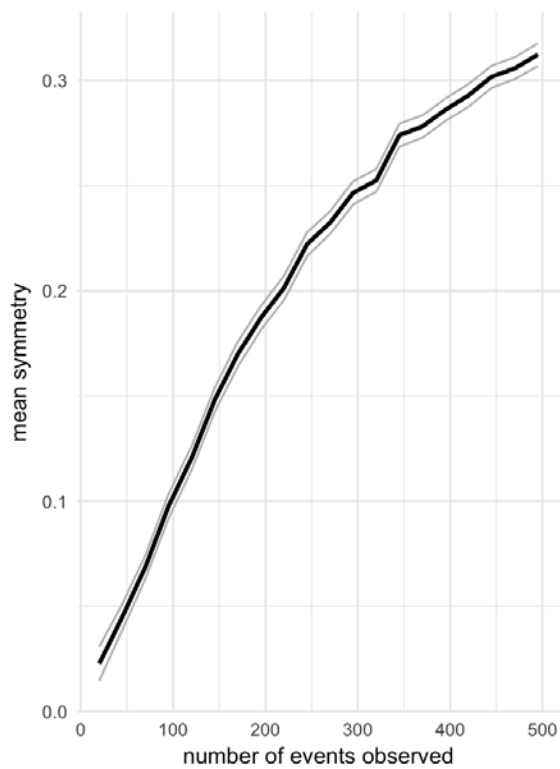

896  
897  
898  
899  
900  
901  
902

**Figure S7. Symmetry with increased sampling effort expected with perfect reciprocity and zero nepotism.** Plot shows mean (black) and 95% confidence interval (grey) of Pearson's correlation between help given and received.
